# Supplementary material for: Arp2/3-dependent mechanical control of morphogenetic robustness in an inherently challenging environment
Source: PubMed Central journal article supplement — Dev Cell. 2021 Mar 8;56(5):687–701.e7. doi: 10.1016/j.devcel.2021.01.005 (PMC7955168; doi:10.1016/j.devcel.2021.01.005), 2021-03-08
Supplement: mmc1.pdf [file mmc1.pdf]

**Developmental Cell, Volume 56**

**Supplemental information**

**Arp2/3-dependent mechanical control  
of morphogenetic robustness  
in an inherently challenging environment**

**Emmanuel Martin, Sophie Theis, Guillaume Gay, Bruno Monier, Christian Rouvière, and Magali Suzanne**

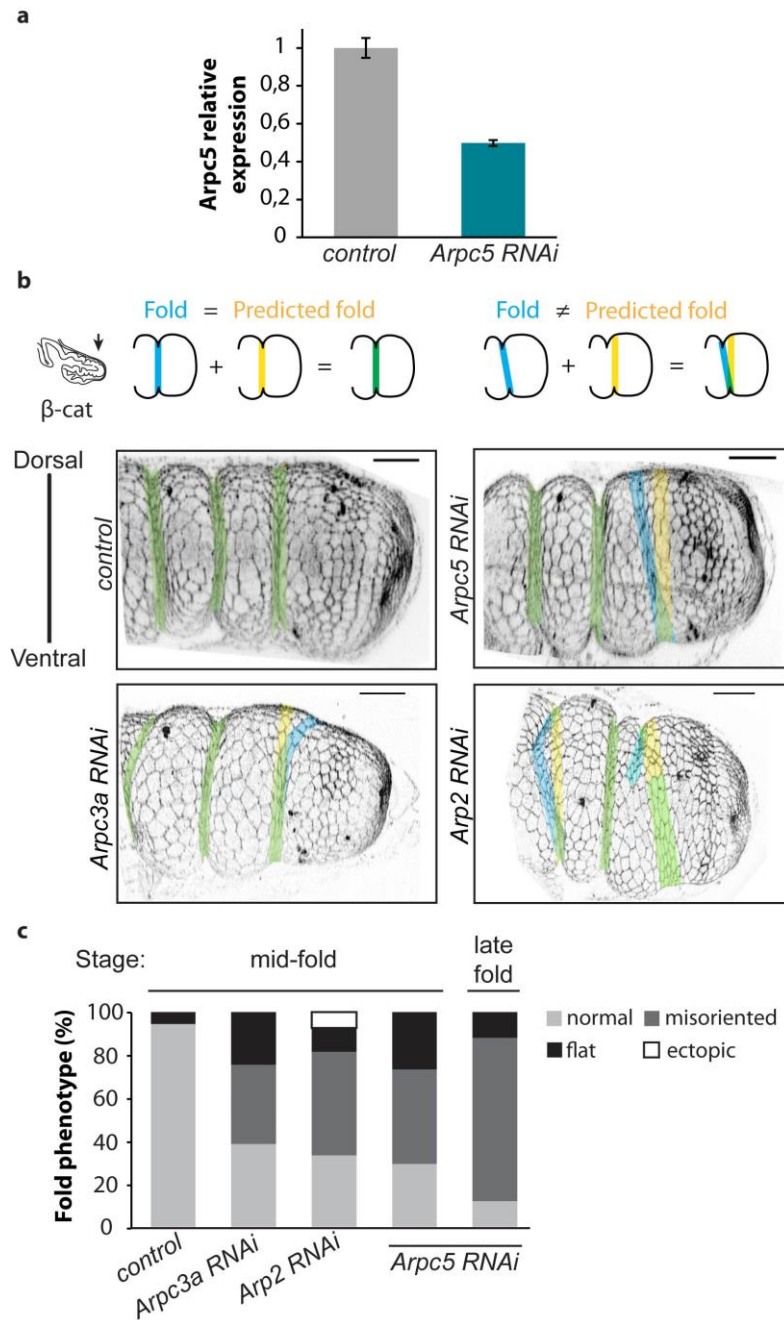

**Figure S1: Fold defects in Arp2/3 knockdown conditions (Related to Figure 1).**

**a**, Normalized expression of Arpc5 mRNA in *control* and *Arpc5 RNAi*. Bar graphs indicate the mean  $\pm$  SEM.

**b**, 3D reconstructions of  $\beta$ -catenin-GFP (*arm-GFP*) leg discs (bottom) and corresponding schematics (top) showing fold phenotypes in *control*, *Arpc5 RNAi*, *Arpc3a RNAi* and *Arp2 RNAi* conditions. Predicted folds are highlighted in yellow, real folds in blue and perfect match between them in green. Scale bar represents 20  $\mu$ m.

**c**, Quantification of T4-T5 fold phenotypes in *control*, *Arpc3a RNAi*, *Arp2 RNAi* and *Arpc5 RNAi* leg discs at mid-fold (WP+1h30 at 29°C) and late fold stage (WP+2h40 at 29°C) (n=54, 57, 27, 60, 25 legs, respectively).

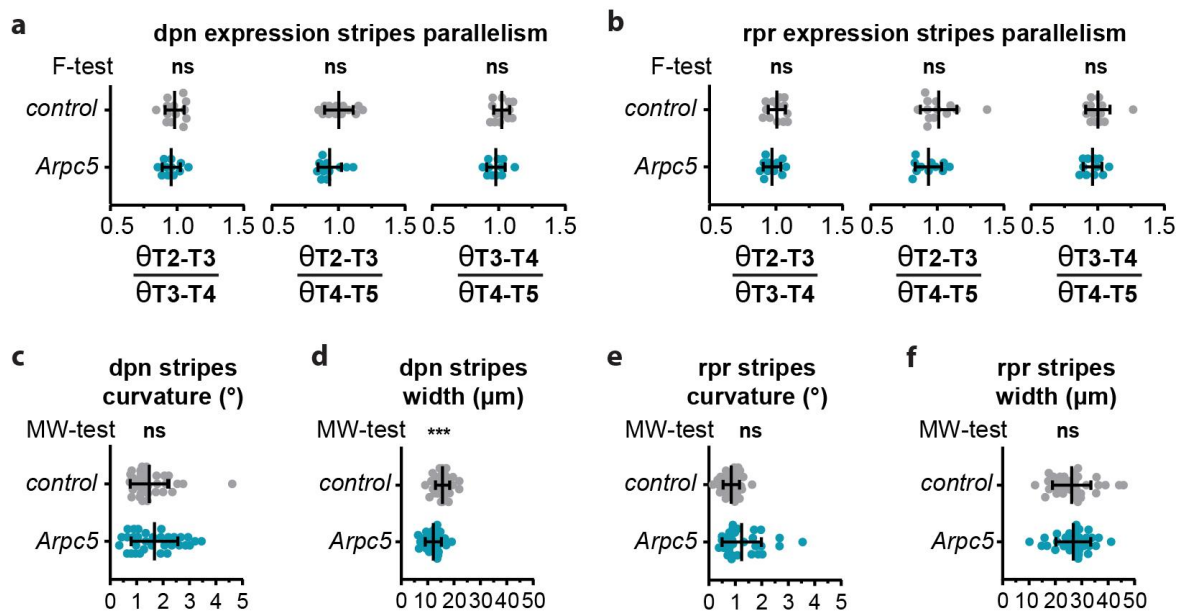

**Figure S2: Positional information is unperturbed in Arpc5 knockdown. (related to Figure 2).**

**a-b**, Dot plots quantifying the parallelism of the stripes of expression of deadpan (e) or reaper (b) in *control* (*rpr-lacZ; Dll-Gal4*) and *Arpc5 RNAi* (*rpr-lacZ; Dll-Gal4; UAS-Arpc5RNAi*) (n=13 and 11 legs respectively) leg discs. A *F*-test of equality of variances has been used to compare the phenotypic variances between *control* and *Arpc5 RNAi* pupae. ns, not significant. Black lines represent the mean  $\pm$  SD.

**c-f**, Dot plots showing the curvature (c,e) or the width (d,f) of the stripes of expression of deadpan (c,d) or reaper (e,f) in *control* (*rpr-lacZ; Dll-Gal4*) and *Arpc5 RNAi* (*rpr-lacZ; Dll-Gal4; UAS-Arpc5RNAi*) (n=13 and 11 legs respectively) leg discs. Black lines represent the mean  $\pm$  SD. Statistical significance has been calculated using Mann Whitney U test. ns, not significant; \*\*\*, p-value < 0.001.

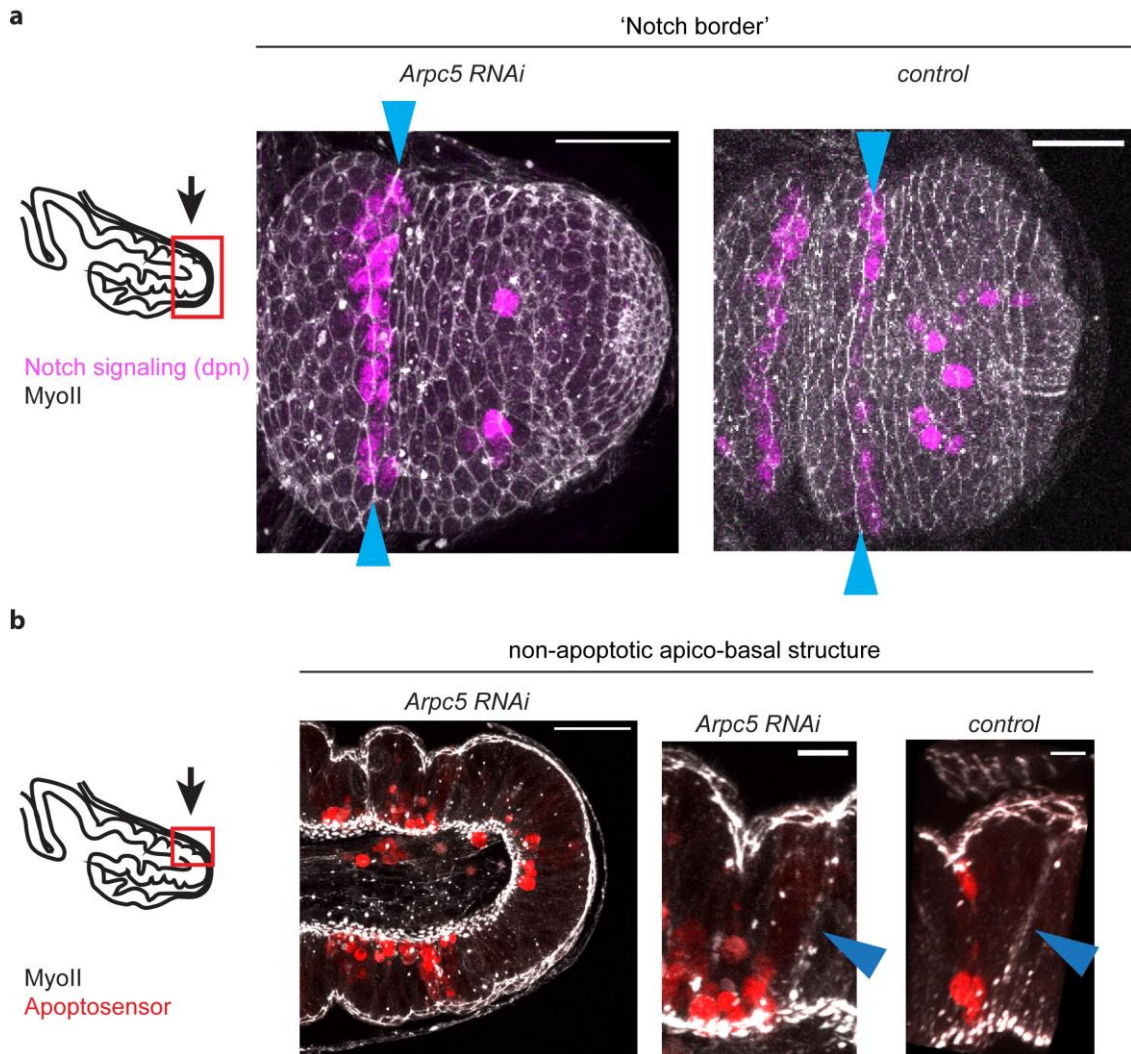

**Figure S3: Characterization of mechanical perturbations (Related to Figure 3).**

**a**, Confocal images of *Arpc5* RNAi (*sqh-GFP[29B]; Dll-Gal4; UAS-Arpc5RNAi*) and *control* (*sqh-GFP[29B]; Dll-Gal4*) leg discs stained with an anti-deadpan antibody (magenta) showing that the supra-cellular cable of myosin is formed at the border of Notch activation domain. Blue arrowheads indicate the Notch activation domain. Scale bar represents 20  $\mu$ m.

**b**, Sagittal views of *Arpc5* RNAi (*sqh-RFPt[3B]; Dll-Gal4, UAS-GC3Ai; UAS-Arpc5RNAi*) and *control* (*sqh-RFPt[3B]; Dll-Gal4, UAS-GC3Ai*) leg discs showing that the apico-basal structures of Myosin II observed outside the fold domain (blue arrowheads) are not related to the presence of apoptotic cells (red). Scale bar represents 20  $\mu$ m and 5  $\mu$ m, respectively for general and close-up view.



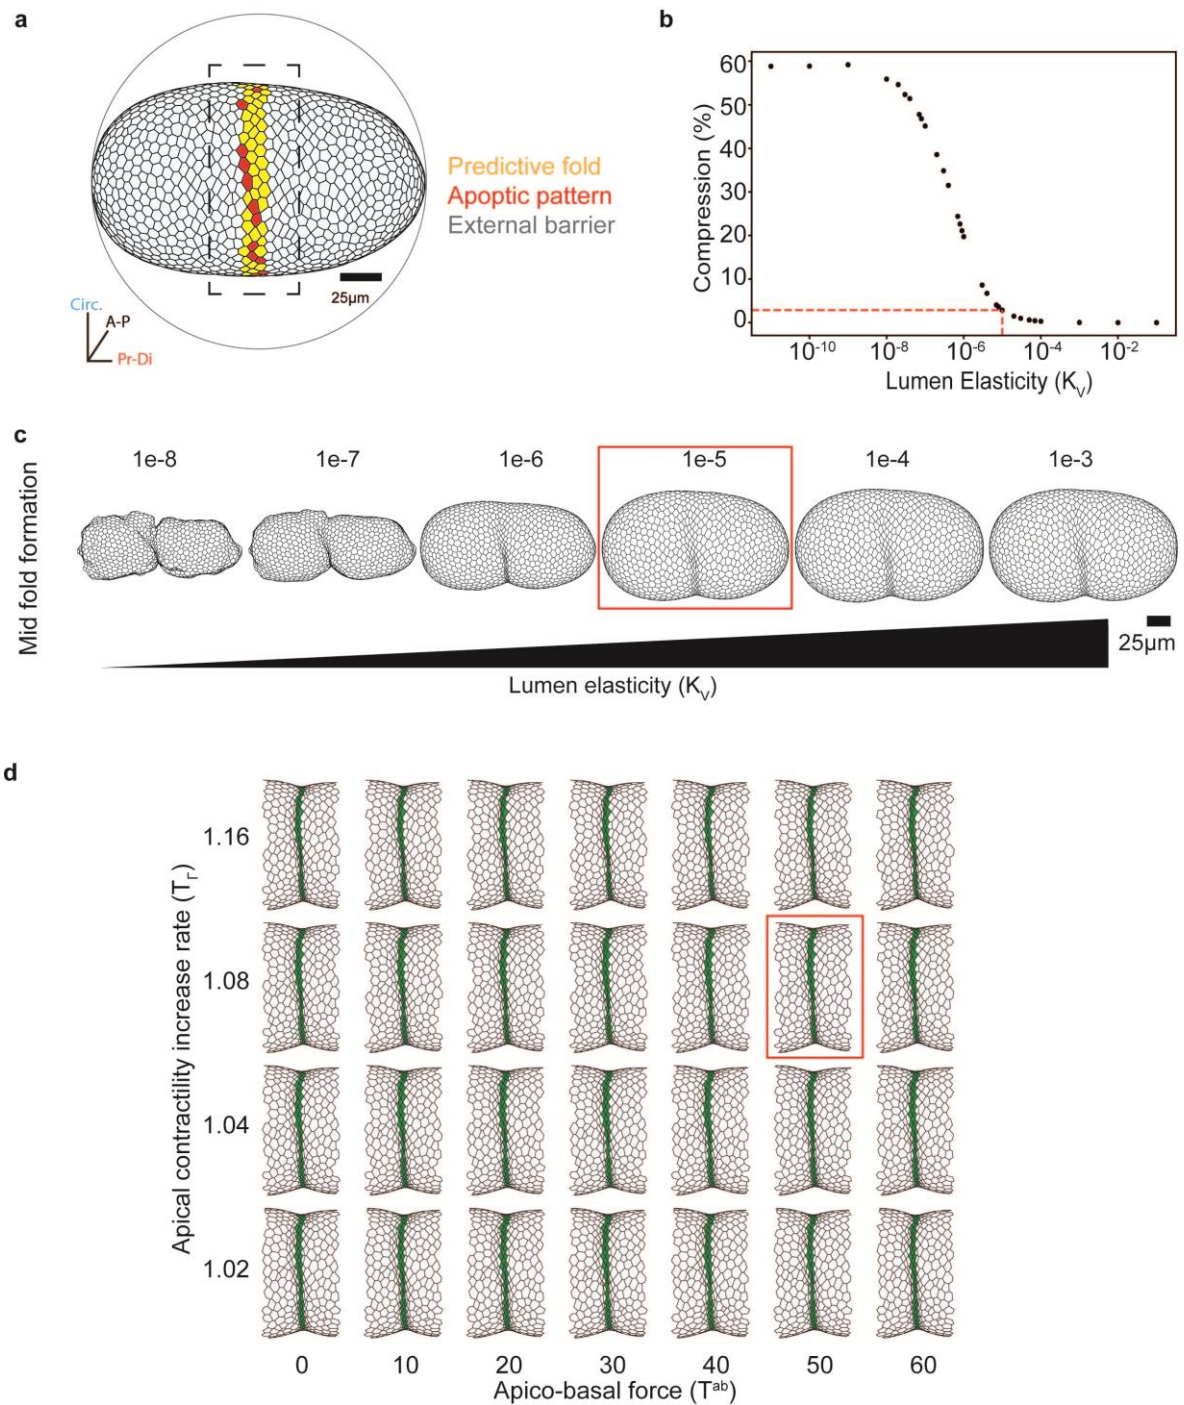

**Figure S4: Simulations of epithelium folding (Related to Figure 3).**

**a**, Lateral view of the virtual tissue. Cells from the predicted fold domain are indicated in yellow, apoptotic cells in red. The tissue is constrained by a spherical external barrier represented by the grey circle. The black dotted square corresponds to the close-up shown in **d**.

**b**, Relative change in the virtual tissue volume as a function of lumen elasticity  $K^V$ . Compression is expressed as the ratio between the observed volume and the equilibrium volume  $V_{L^0}$ .

**c**, Aspect of the virtual tissue at maximum fold depth for different values of  $K^V$ . Red squared corresponds to the chosen value for  $K^V$ .

**d**, Simulations obtained at maximal fold depth for distinct values of apical contractility increase rate (y-axis) and apico-basal force (x-axis). All other parameters are unchanged. Fold is in green.

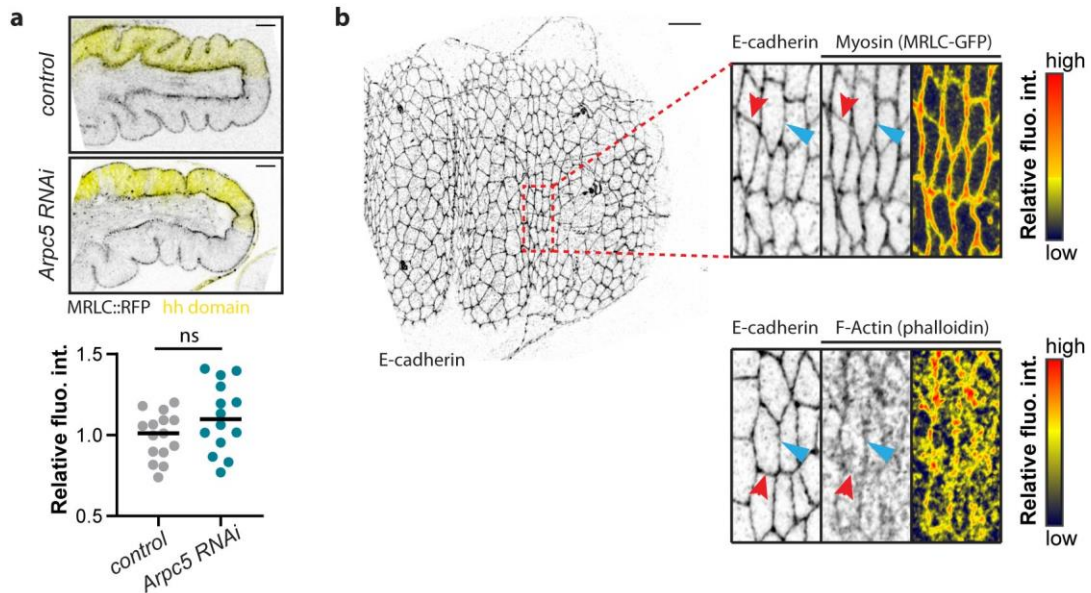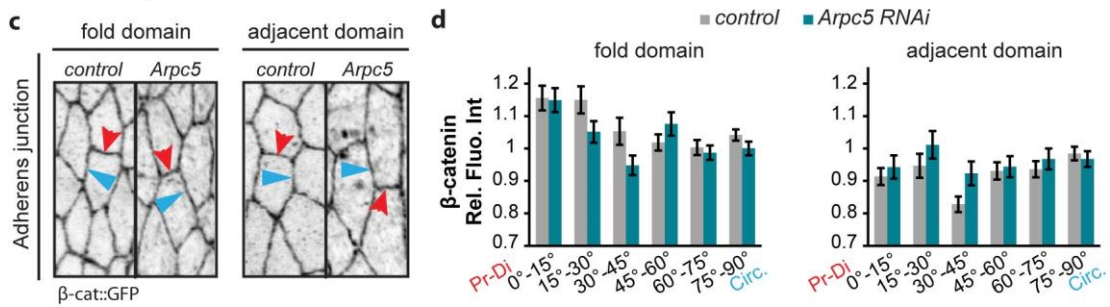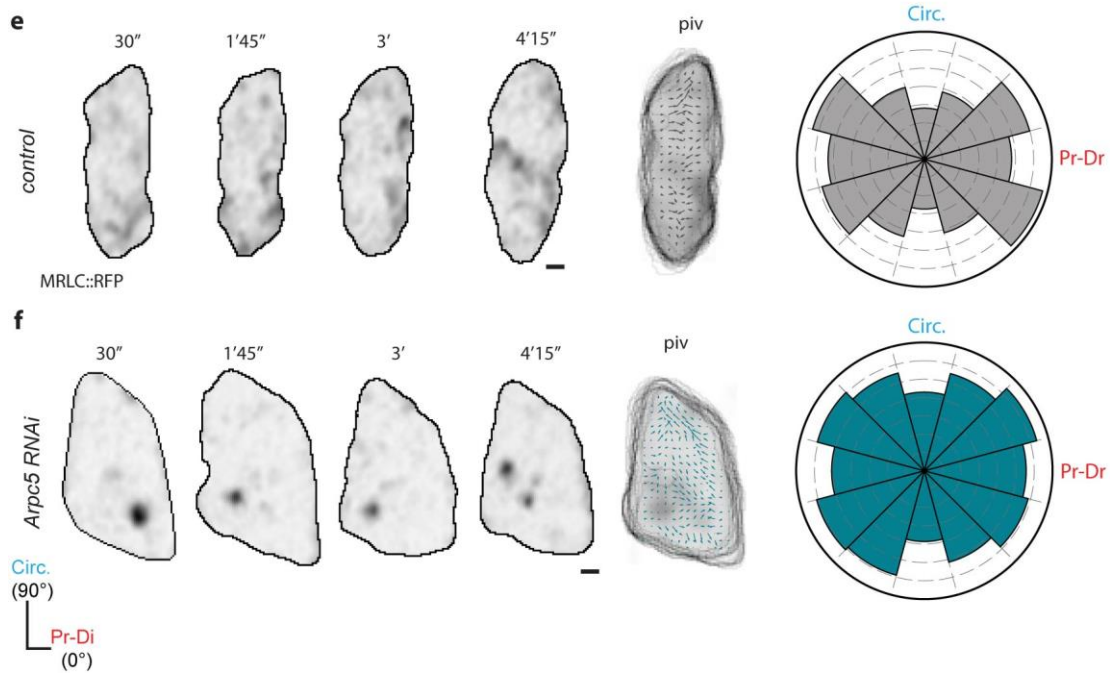

**Figure S5: Cortical Myosin II intensity level and adherens junctions in Arpc5 knockdown (Related to Figure 4)**

**a,** (top) Confocal images showing Myosin II distribution in a control (*sqh-GFP; hh-Gal4, UAS-LacZ*) (top, n=15) or a *Arpc5* RNAi (*sqh-GFP; hh-Gal4, UAS-Arpc5RNAi*) (bottom ; n=14) leg discs. The posterior “Hedgehog” domain is highlighted in yellow. Scale bar represents 30  $\mu\text{m}$ . (bottom) Dot plots showing the relative fluorescence intensity of Myosin II calculated as the ratio between the posterior domain (hh domain, in yellow) and the anterior domain.

**b,** (left) Confocal images showing the leg morphogenesis in *sqh-RFP; Dll-Gal4; UAS-Arp3-GFP* animals. Scale bar represents 10  $\mu\text{m}$ . (right) Close up views of confocal images showing the distribution of adherens junction (E-cadherin) and either Myosin II (top) or F-actin (bottom, stained with phalloidin). The intensities of myosin and actin are color-coded as indicated. Red and blue arrowheads indicate proximal-distal and circumferential junctions, respectively

**c,** Close up views of confocal images showing the distribution of adherens junctions in control (*Dll-Gal4; arm-GFP*) or *Arpc5* RNAi (*Dll-Gal4; arm-GFP, UAS Arpc5RNAi*) leg discs in the fold domain (left) and in the adjacent domain (right). Red and blue arrowheads indicate proximal-distal and circumferential junctions, respectively

**d,** Quantification of  $\beta$ -catenin distribution at junctions in leg discs control or *Arpc5* RNAi, in both the fold domain (left; n= 668 and n= 571 junctions respectively) and the adjacent domain (right; n= 578 and n= 449 junctions respectively). Bar graphs indicate the mean  $\pm$  SEM.

**e-f,** PIV analysis of MRLC-RFP flows in control (**d**) and *Arpc5* RNAi (**e**). Stills from isolated cells are presented on the left showing Myosin II dynamics, with vectors representing the local displacements superimposed on a time projection. On the right, polar charts represent the mean distance of local displacements for each orientation.

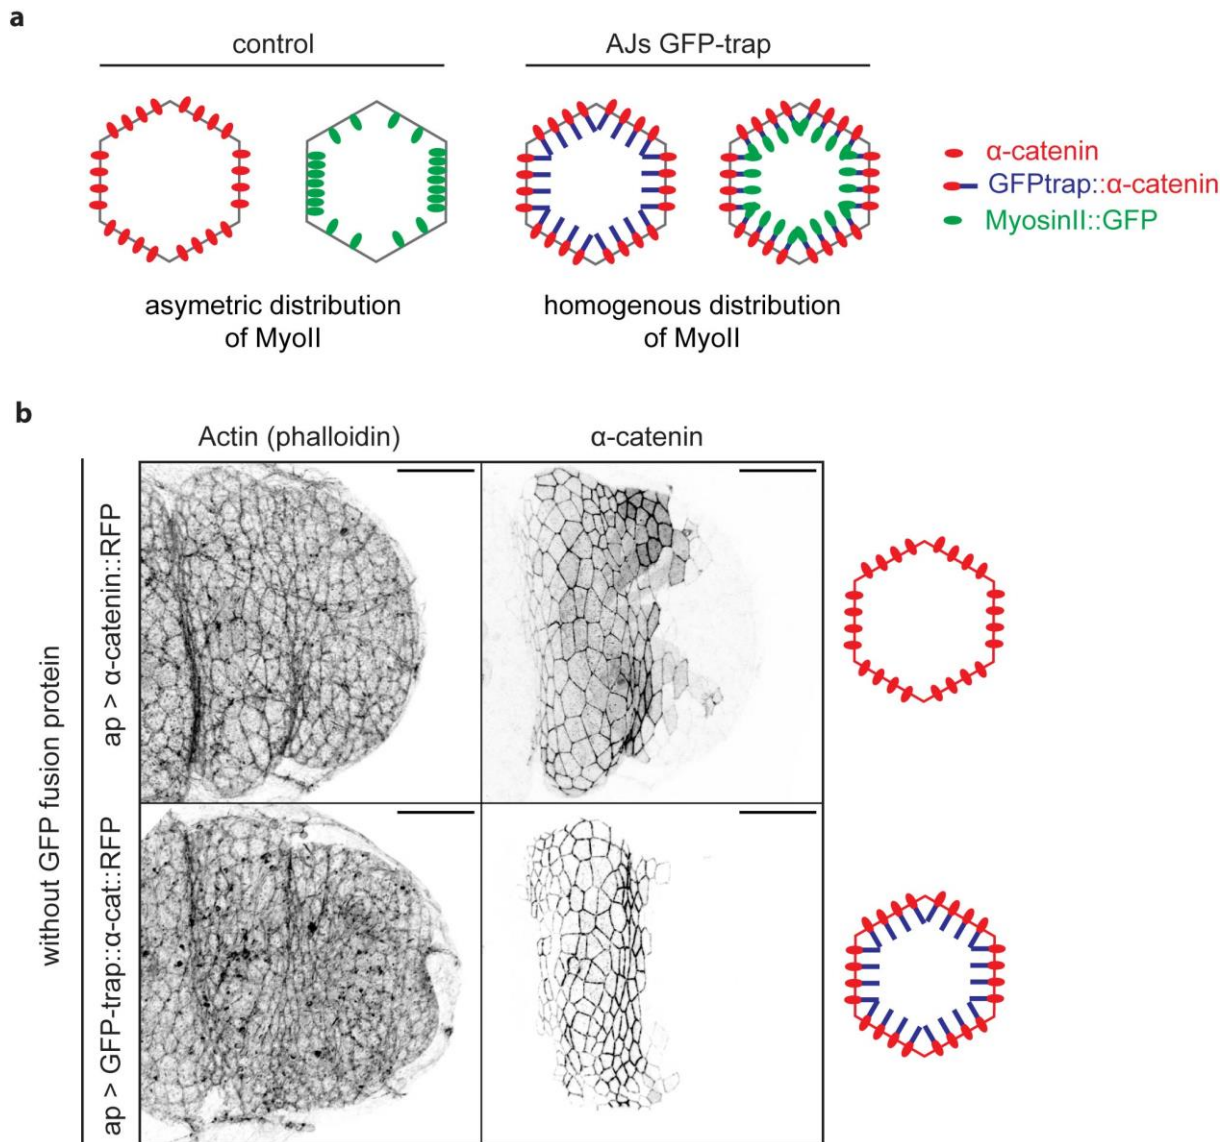

**Figure S6: Characterization of the AJs-GFP-trap construct (Related to Figure 6).**

**a**, Schematics of junctional Myosin II distribution in a *control* or an AJs-GFP-trap; MyosinII-GFP conditions.

**b**, Confocal images of *tubG80ts; ap-Gal4, UAS- $\alpha$ -catenin-TagRFP* and *tubG80ts; ap-Gal4, UAS-vhhGFP4- $\alpha$ -catenin-TagRFP (AJs-GFP-Trap)* leg discs in the absence of GFP fusion protein. The F-actin distribution (phalloidin) shows that the expression of AJs-GFP-Trap alone does not perturb epithelial organization. Scale bar represents 20  $\mu$ m.



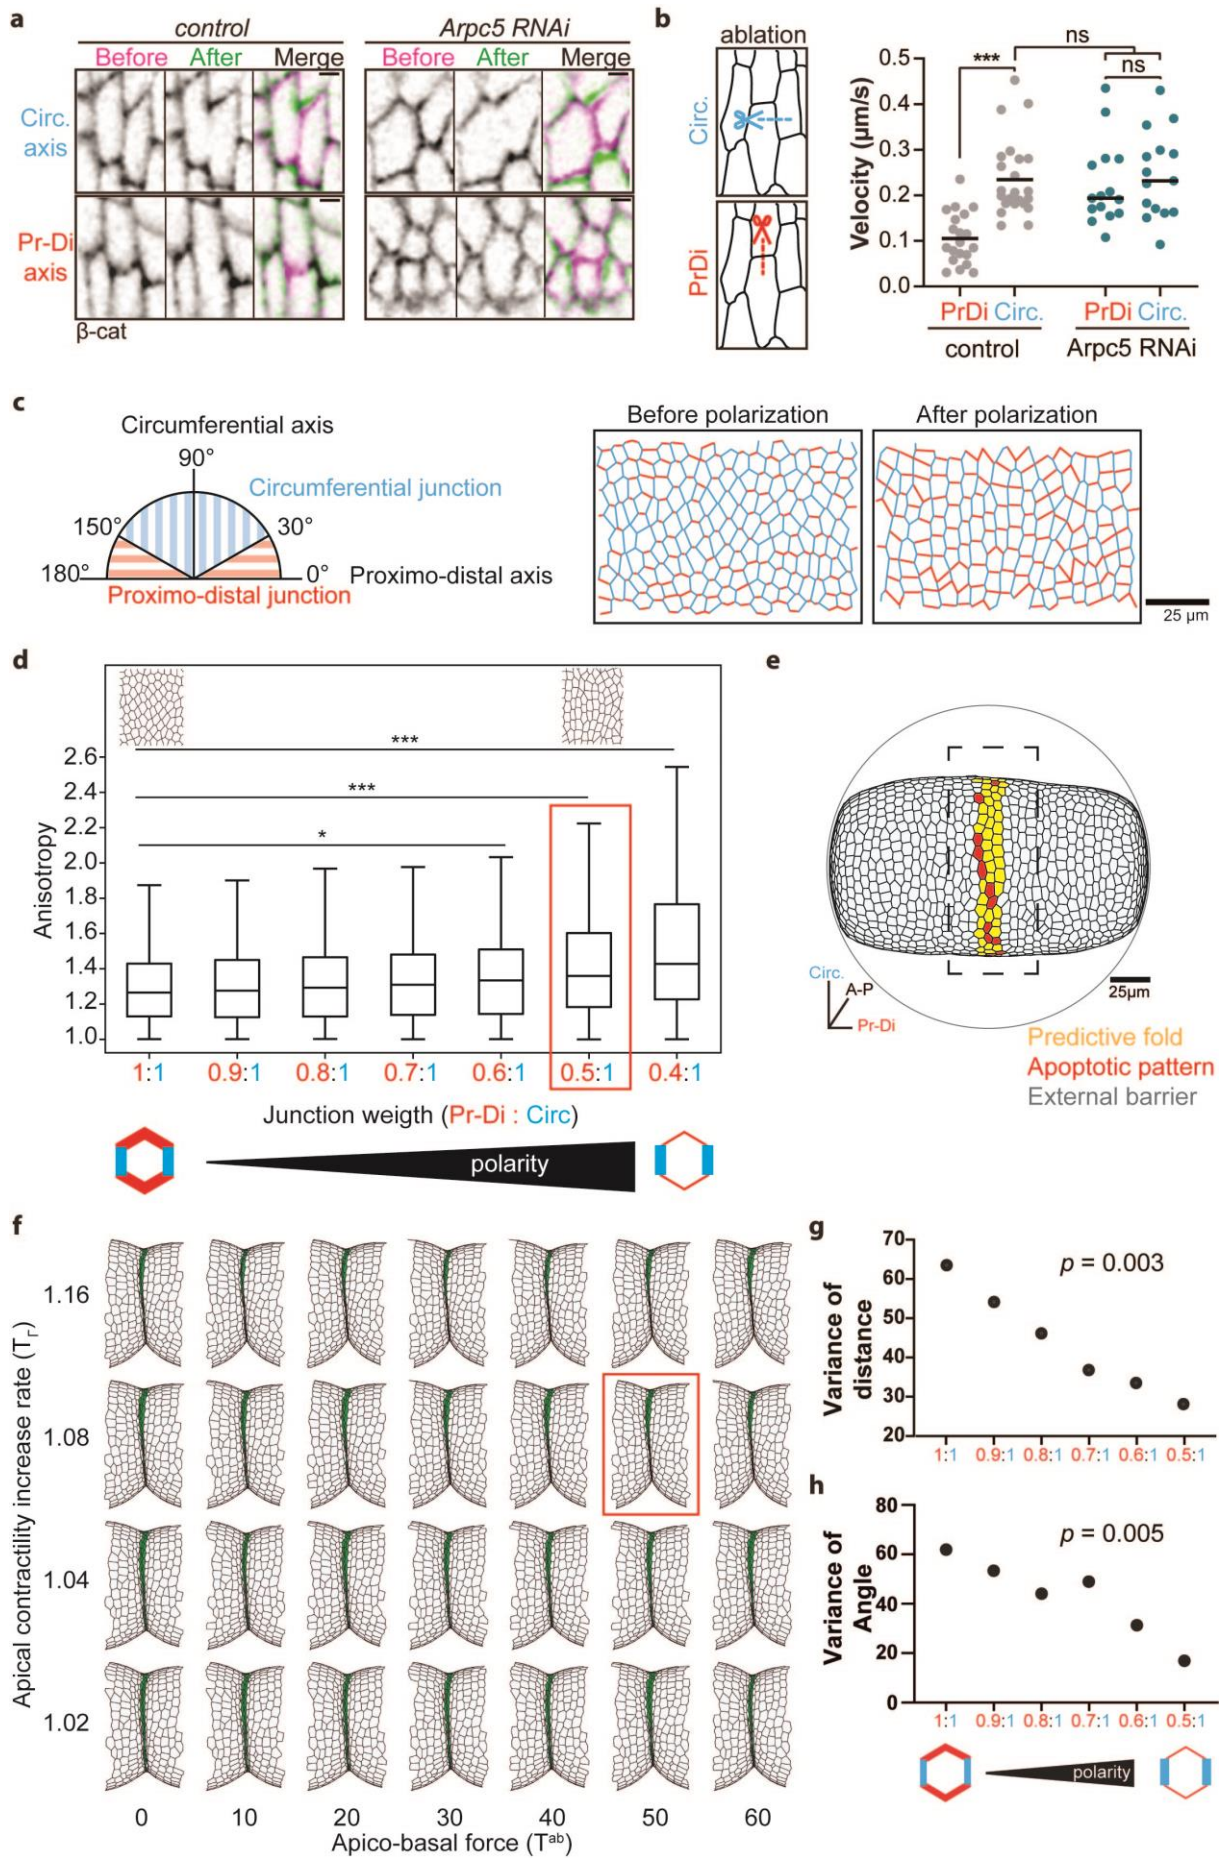

**Figure S7: Simulations of fold formation with different values of planar polarity of junctional tension. (Related to Figure 6).**

**a,** Confocal images showing the dynamics of adherens junctions before and after laser ablation of circular (top) and proximal-distal (bottom) junctions in *control* (*Dll-Gal4; arm-GFP*) and *Arpc5 RNAi* (*Dll-Gal4; arm-GFP, UAS-Arpc5RNAi*) leg discs. Scale bar represents 2  $\mu\text{m}$ .

**b,** Dot plots showing initial recoil velocity of junctions after laser microdissection in *control* and *Arpc5 RNAi* leg discs (n=24, 20, 15 and 15 respectively). Statistical significance has been calculated using Mann Whitney U test. ns, not significant; \*\*\*, p-value < 0.001.

**c,** Left panel: Scheme representing the distribution of circumferential and proximal-distal junctions according to their orientation. Blue junctions are considered oriented in the circumferential axis. Red junctions are considered oriented in the proximal-distal axis. Right panel: repartition of the two types of junctions in the simulation with or without polarization of the tissue.

**d,** Box plots presenting the values of tissue anisotropy for different junction weight ratios (weight of proximal-distal junctions/weight of circumferential junctions). The preferred junctional weight ratio is indicated by the red square. Cell shapes are no longer physiological for lower values of weight ratio (data not shown).

**e,** Simulation showing the general organization of the polarized tissue before fold formation. Cells from the predicted fold are in yellow, apoptotic cells in red. The tissue is surrounded by a spherical external barrier represented by the grey circle. The black dotted square corresponds to the close-up in panel **g**.

**f,** Simulations obtained at maximal fold depth for distinct values of contractility increase rate (y-axis) and apico-basal force (x-axis) with planar polarity. All other parameters are unchanged. Fold is in green. Preferred values are indicated by a red square.

**g,** Scatter plot showing the correlation between the variance of the fold deviation and the polarity of the tissue from 55 *in silico* analysis. A Spearman rank correlation has been used to evaluate this correlation. The p-value is indicated under the graph.

**h,** Scatter plot showing the correlation between the variance of the fold angle and the polarity of the tissue from 55 *in silico* analysis. A Spearman rank correlation has been used to evaluate this correlation. The p-value is indicated under the graph.
